# Supplementary material for: Effect of DSS-Induced Ulcerative Colitis and Butyrate on the Cytochrome P450 2A5: Contribution of the Microbiome
Source: MDPI journal article supplement (doi:10.3390/ijms231911627), 2022-10-01
Supplement: s1 [file s1]

## Effect of DSS-Induced Ulcerative Colitis and Butyrate on the Cytochrome P450 2A5: Contribution of the Microbiome

Stefan Satka, Veronika Frybortova, Iveta Zapletalova, Pavel Anzenbacher, Eva Anzenbacherova, Hana Kozakova, Dagmar Srutkova, Tomas Hudcovic and Lenka Jourova

### Supplementary Data

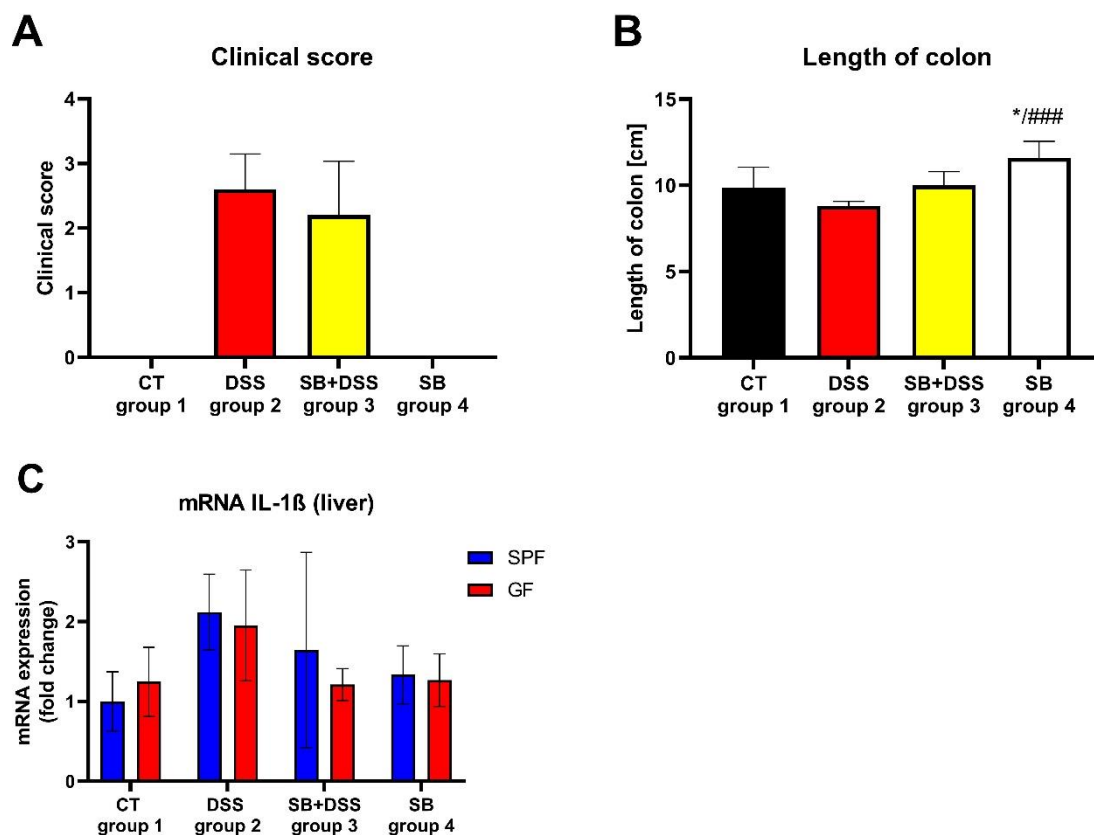

**Figure S1.** Impact of butyrate pre-treatment on clinical symptoms length of colon and gene expression of IL-1 $\beta$  in the dextran sodium sulfate (DSS) mouse model of ulcerative colitis. **(A)** Occurrence of diarrhea and rectal bleeding in germ-free (GF) mice was summarized in the clinical score. **(B)** Shortening of colon length in GF mice. **(C)** Gene expression of IL-1 $\beta$  in liver of specific-pathogen-free (SPF) mice and GF mice. Data in graphs are expressed as mean  $\pm$  SD. One-way ANOVA with Tukey's multiple post hoc test was used for comparison of experimental groups to CT controls (group 1: \* $p < 0.05$ ) or to DSS-controls (group 2: ### $p < 0.001$ ). **CT** (group 1): drinking water for 1 week; **DSS** (group 2): 1 week 2.5% DSS in drinking water; **SB+DSS** (group 3): 0.5% sodium butyrate (SB) in drinking water for 2 weeks followed by a week of 2.5% DSS in drinking water; **SB** (group 4): 0.5% SB in drinking water for 2 weeks.
